# Supplementary material for: Changes in Waist Circumference and the Incidence of Acute Myocardial Infarction in Middle-Aged Men and Women
Source: PLOS journal article supplement (doi:10.1371/journal.pone.0026849), 2011-10-26

**Figure S1. The study population**

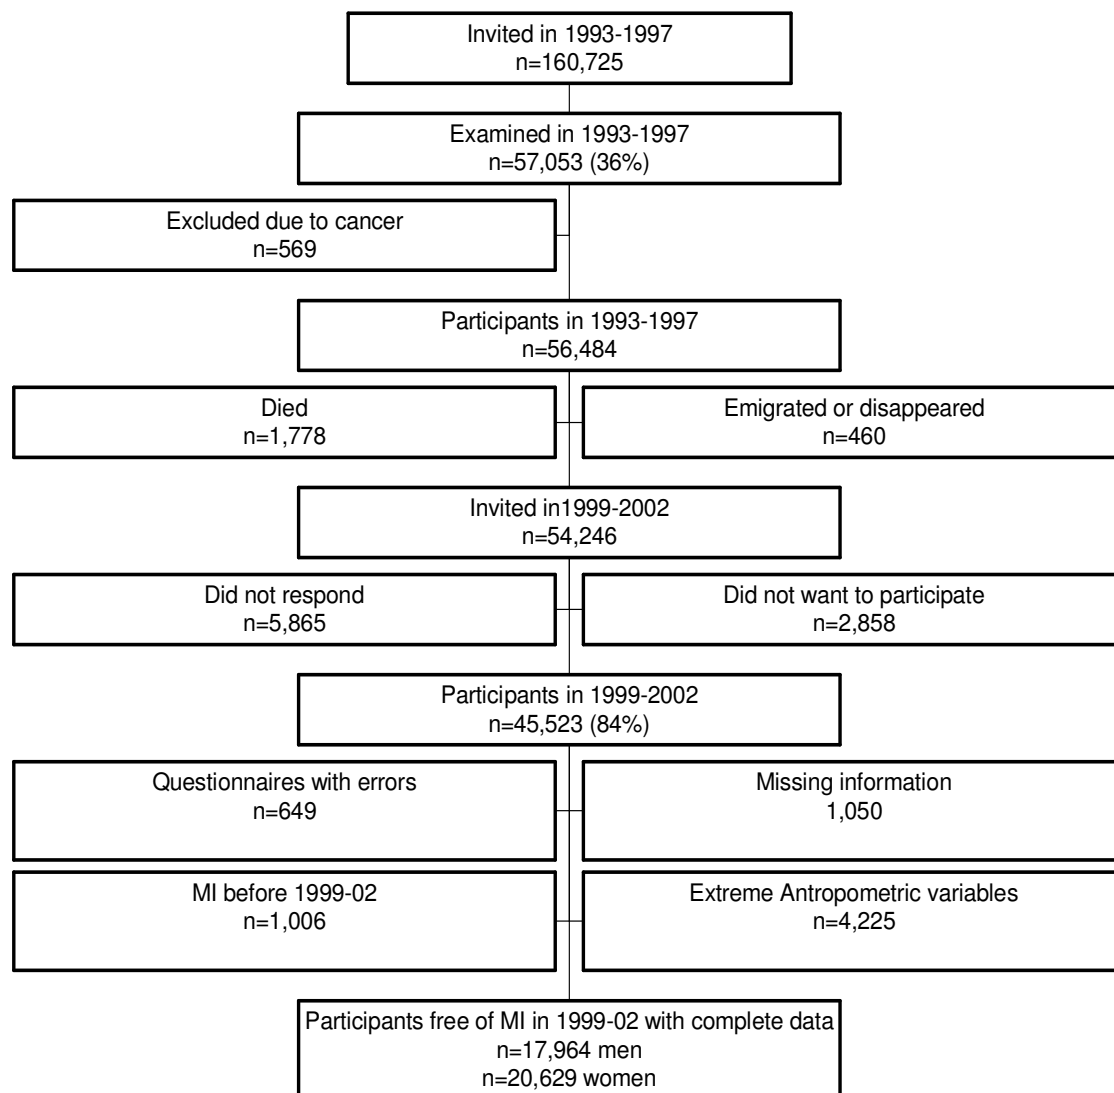

Supplement: S1 (10.1371/journal.pone.0026849.s001) [file journal.pone.0026849.s001]
